# Supplementary material for: Diagnosis of Crohn’s disease and ulcerative colitis using the microbiome
Source: PubMed Central journal article supplement (PMC10640746; doi:10.1186/s12866-023-03084-5), 2023-11-11

**Supplementary file**

**Diagnosis of Crohn's Disease and Ulcerative Colitis  
Using the Microbiome**

Da-Yeon Kang<sup>1,2\*</sup>, Jong-Lyul Park<sup>3\*</sup>, Min-Kyung Yeo<sup>4\*</sup>,  
Sang-Bum Kang<sup>5</sup>, Jin-Man Kim<sup>4</sup>, Ju Seok Kim<sup>6^</sup>, and  
Seon-Young Kim<sup>7^</sup>

Fig. S1

A

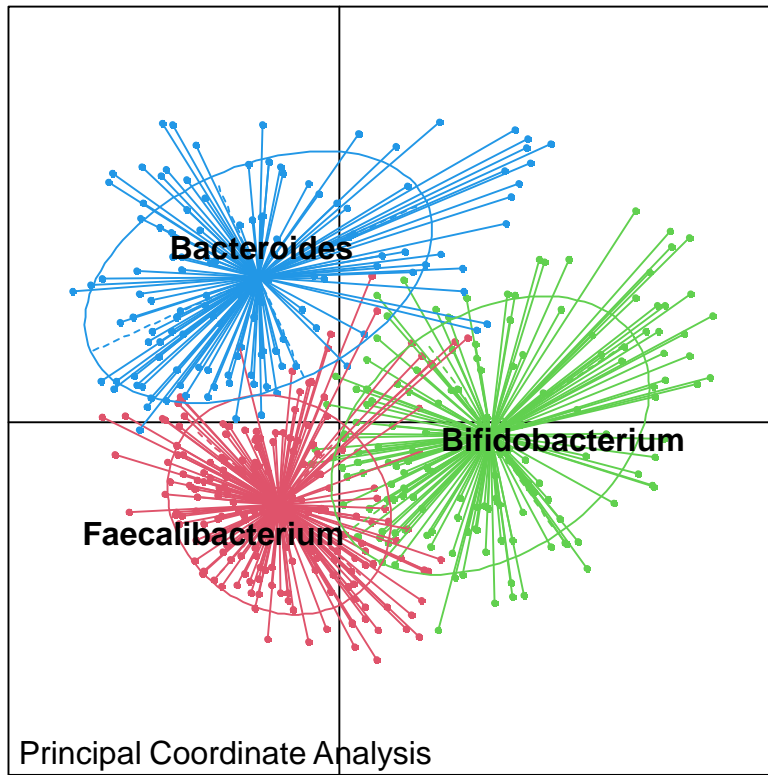

B

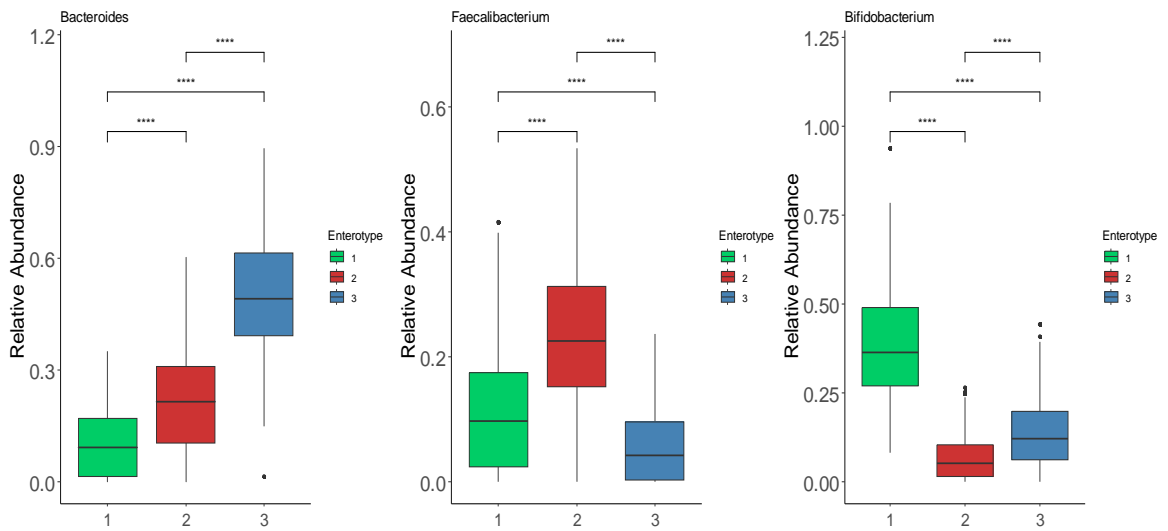

Fig. S2

A

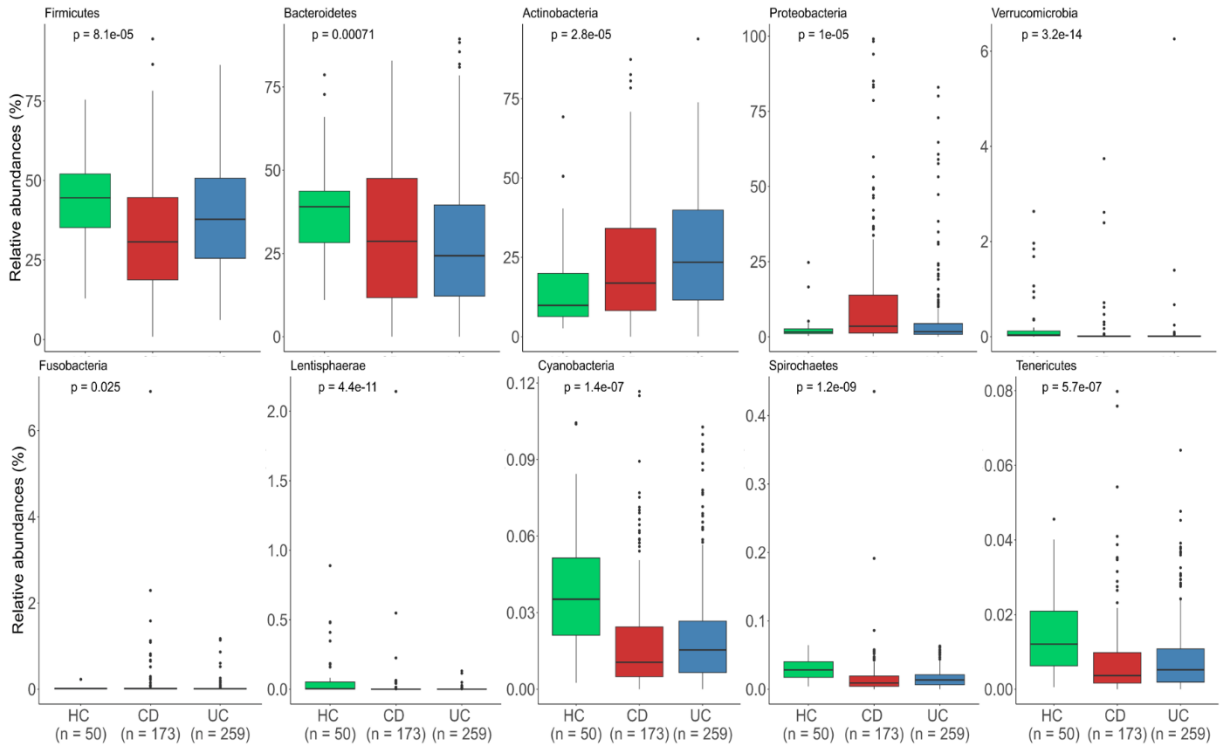

B

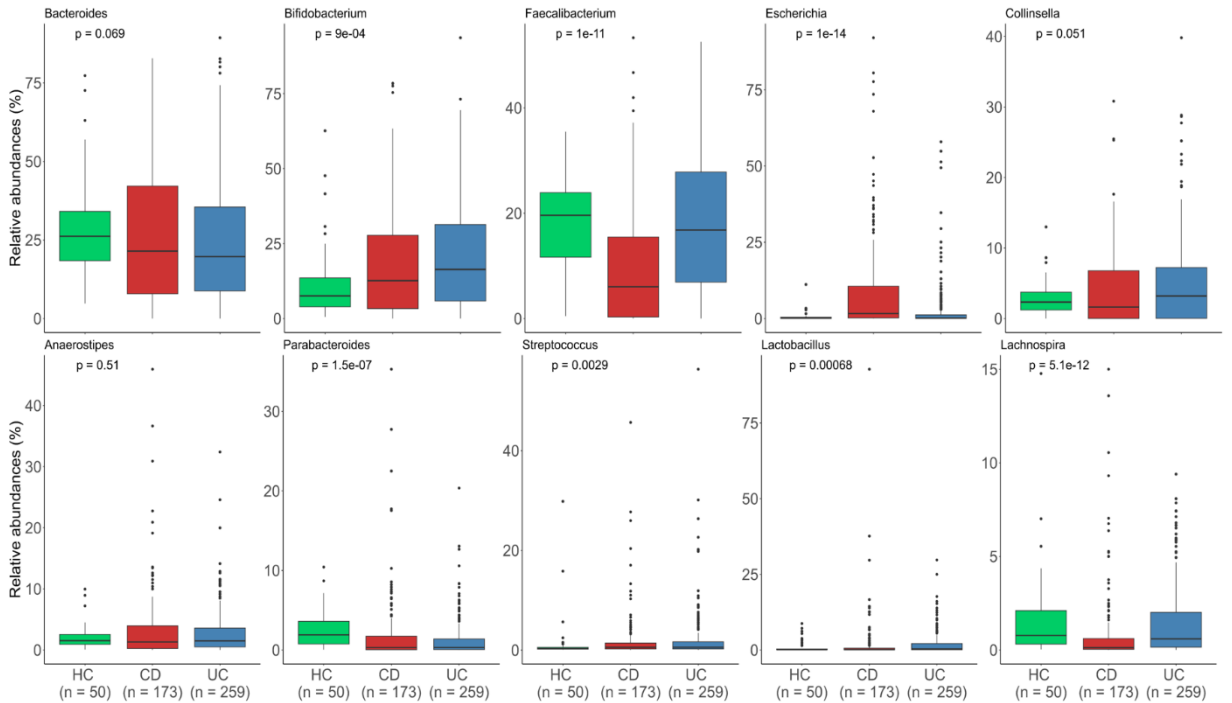

C

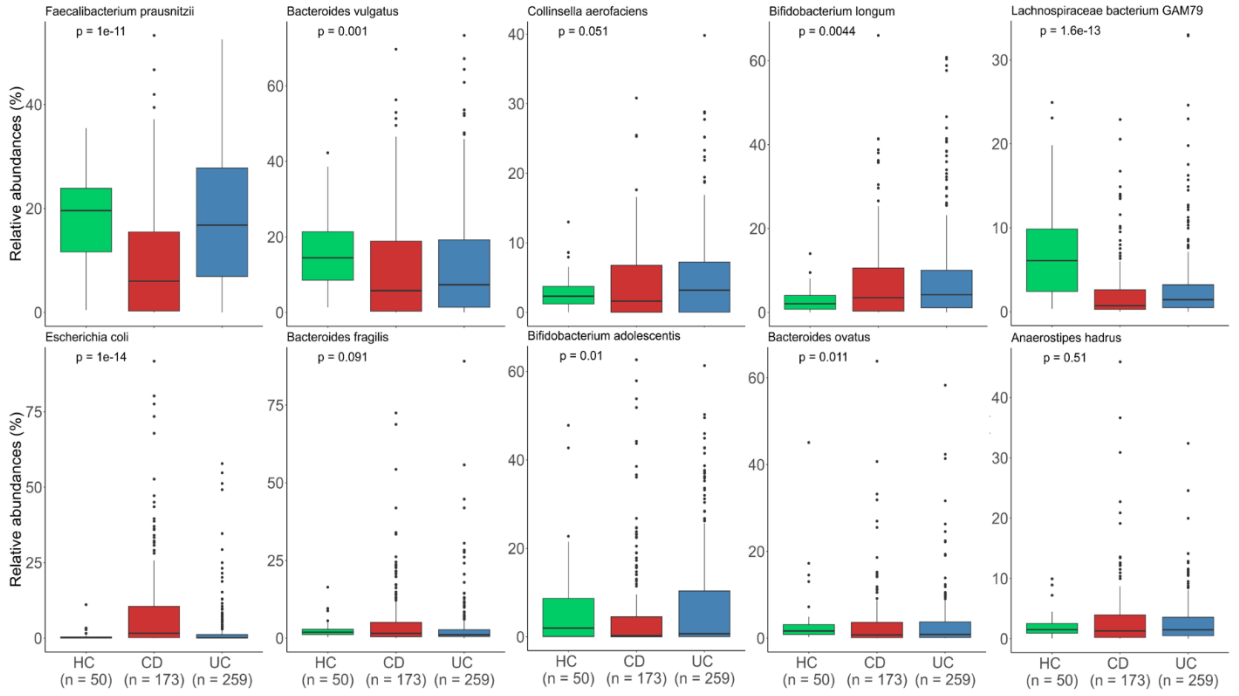

Fig. S3

A

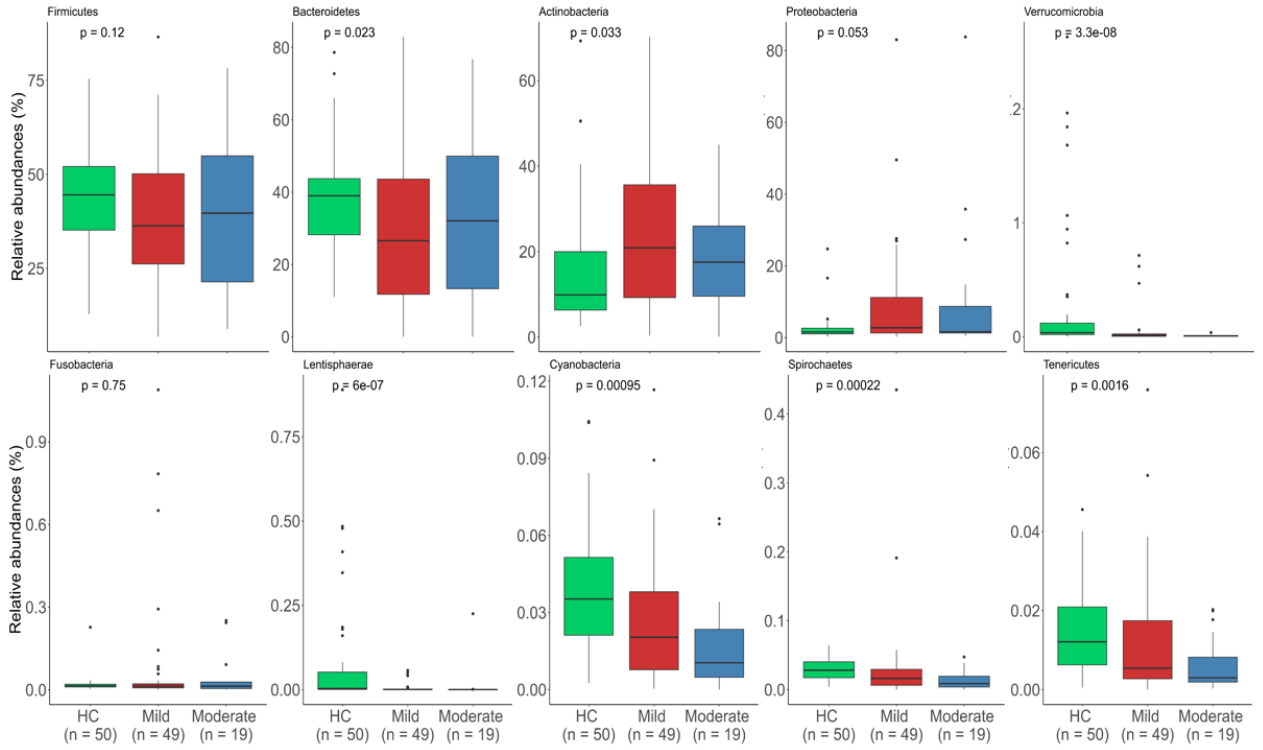

B

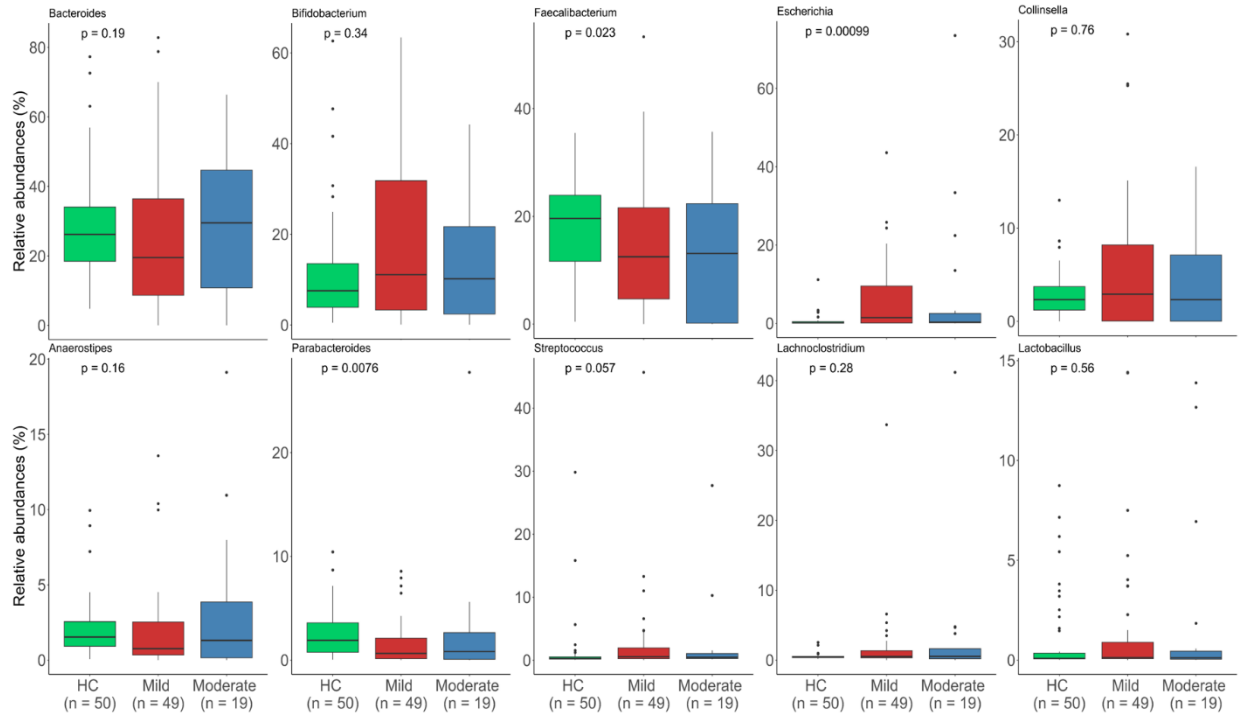

C

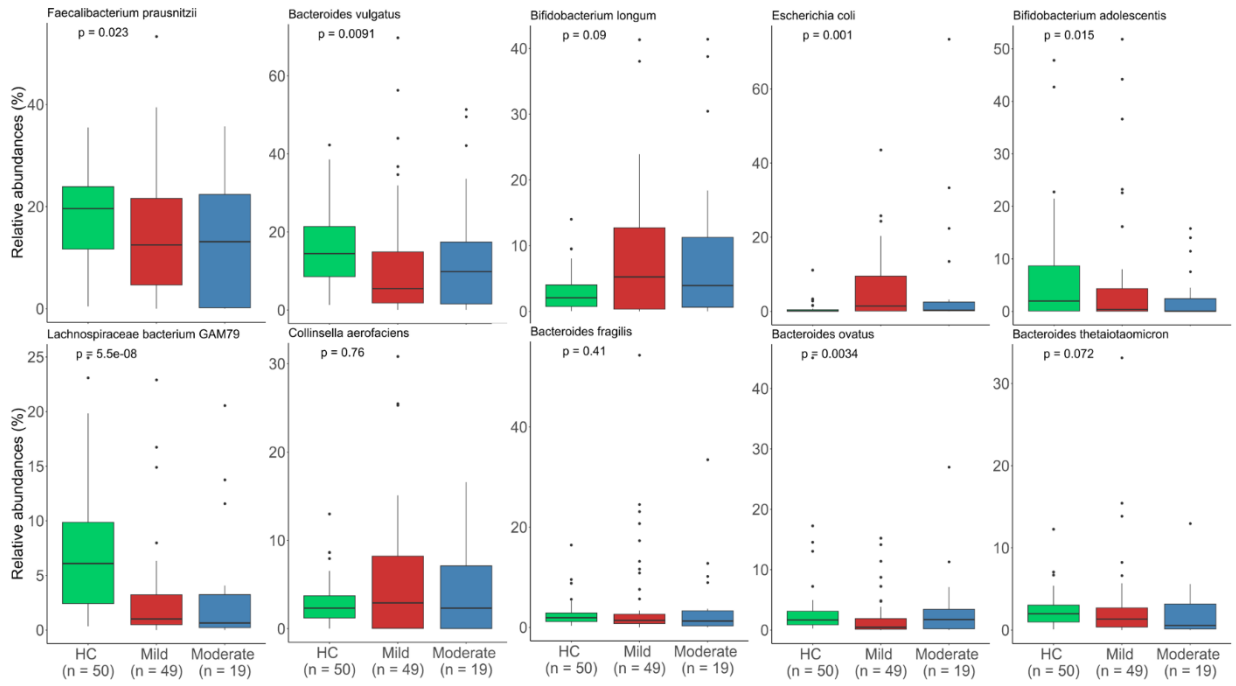

Fig. S4

A

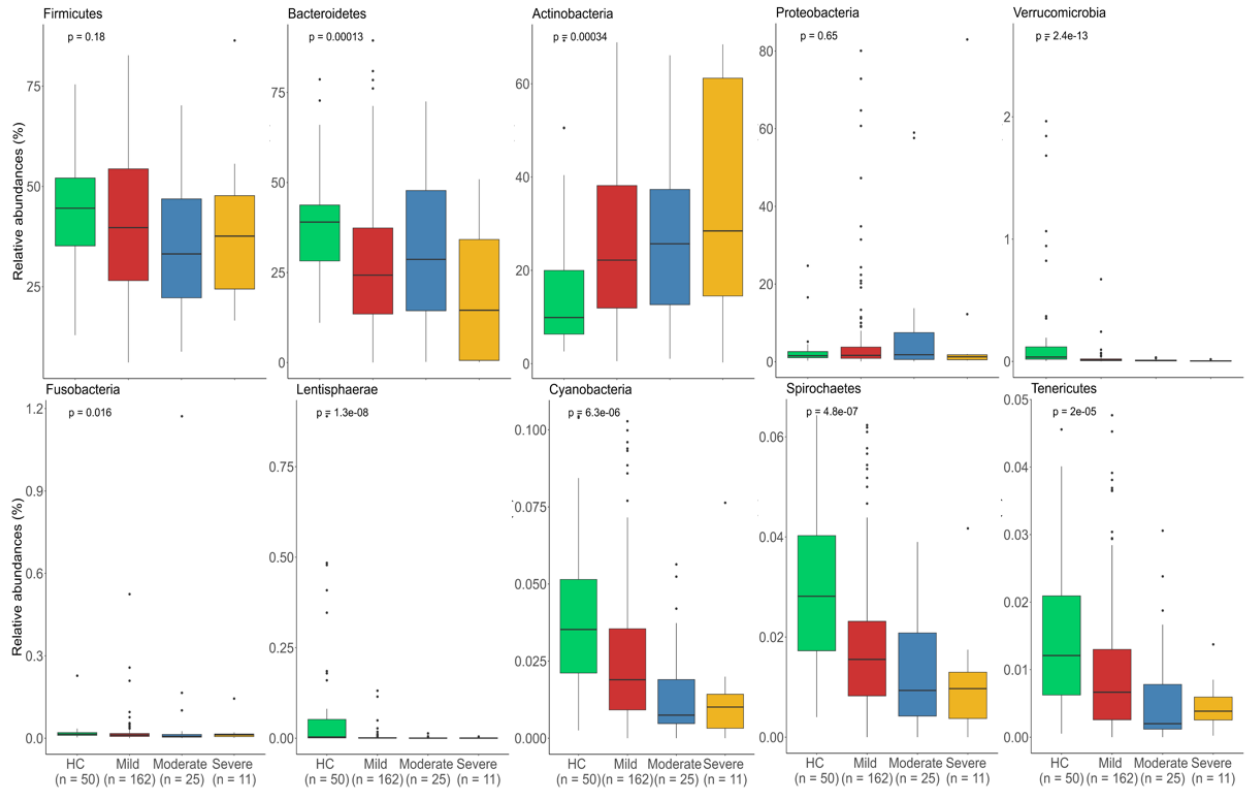

B

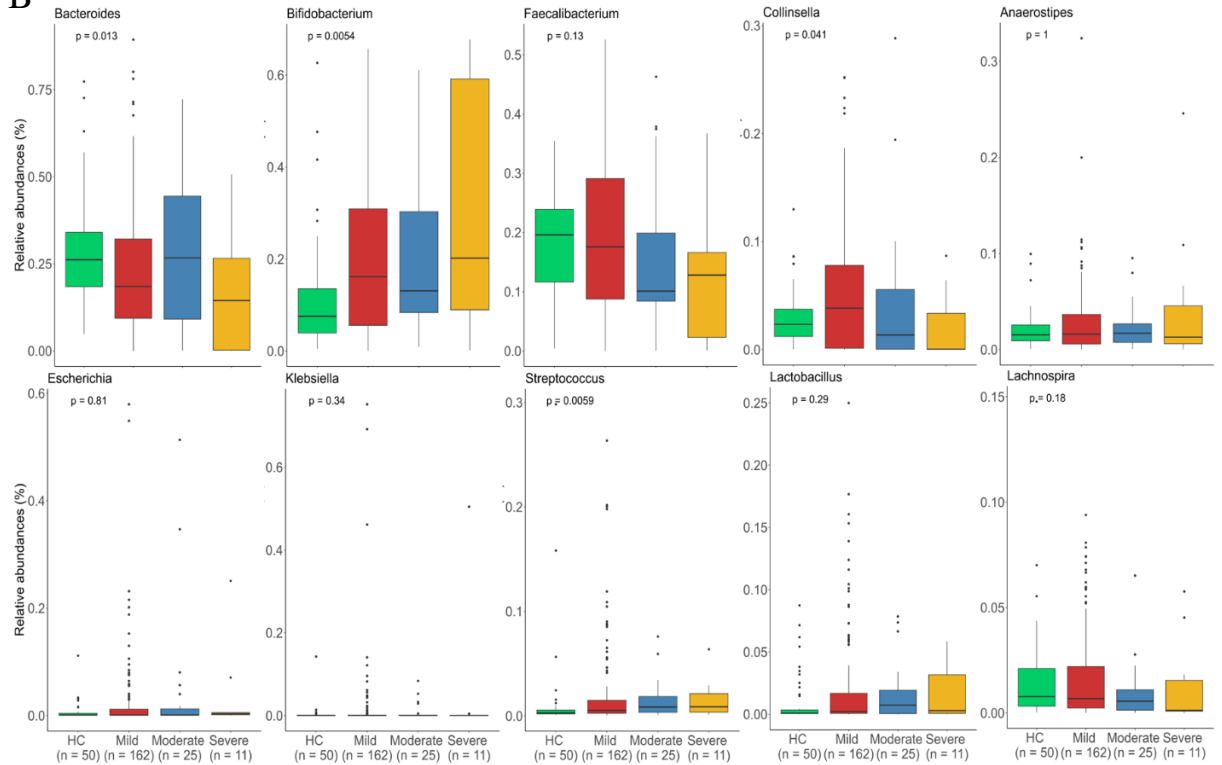

C

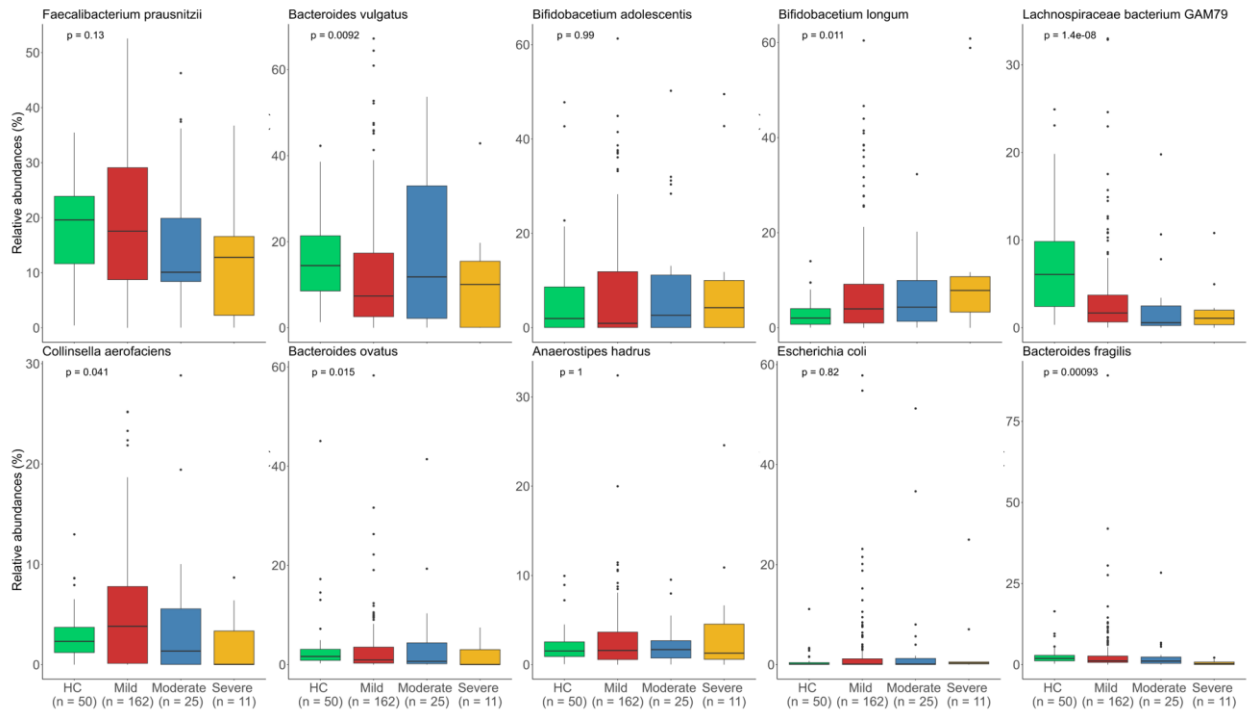



Fig. S5

A

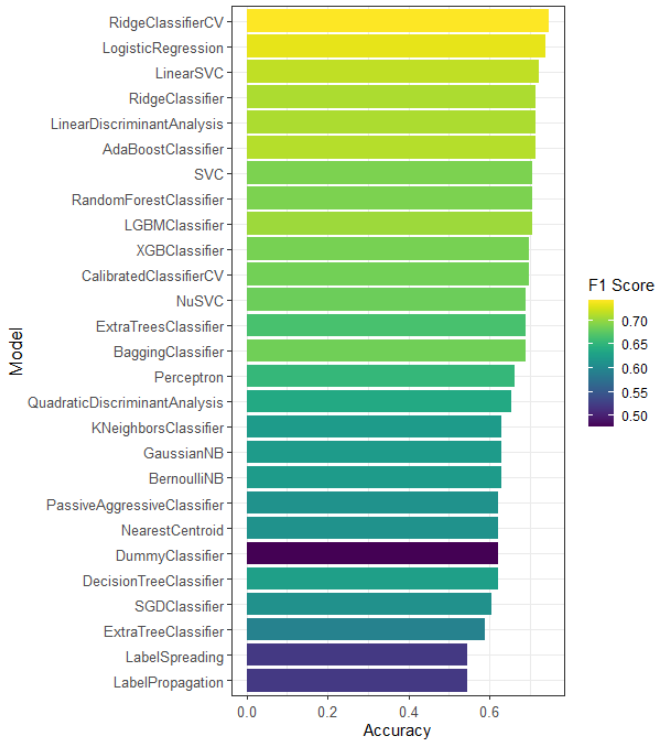

B

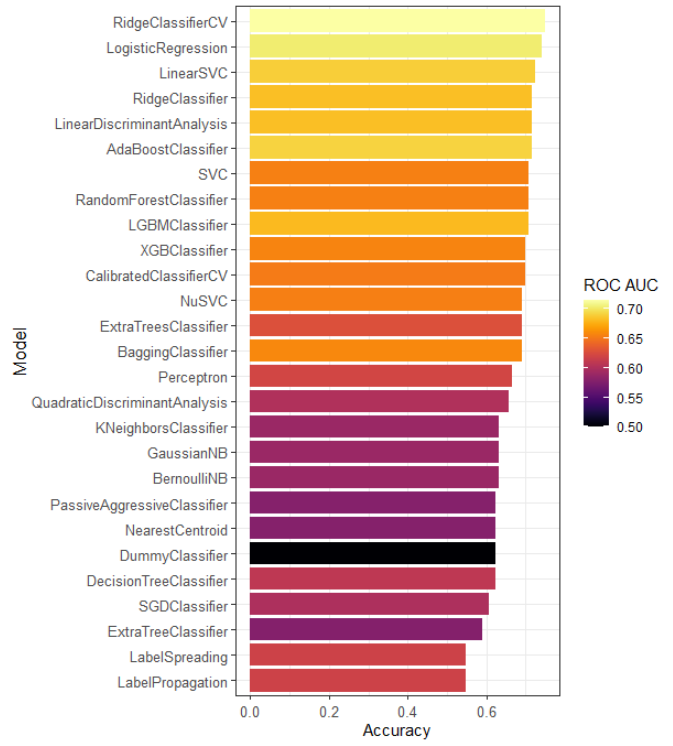

Fig. S6

A

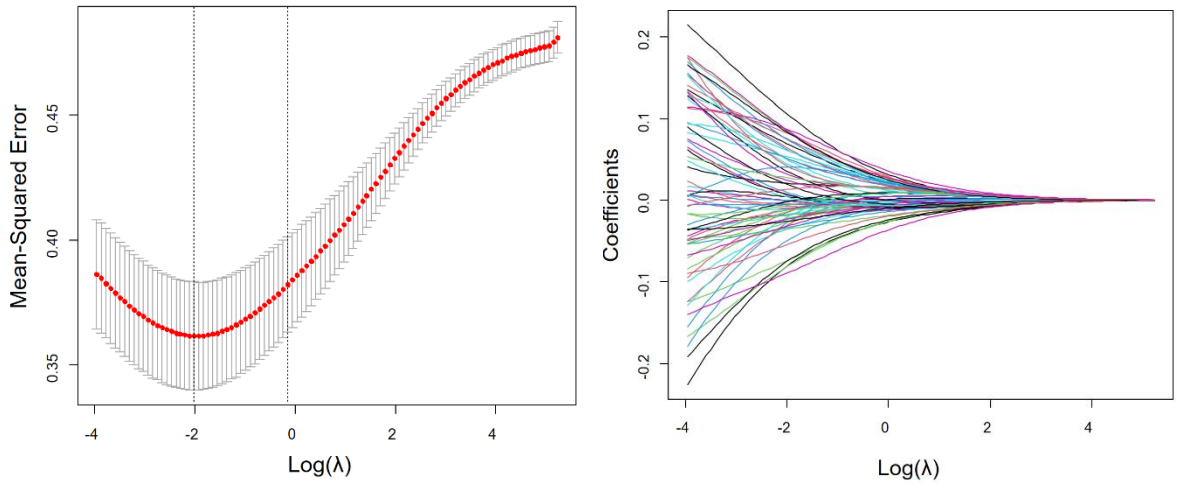

B

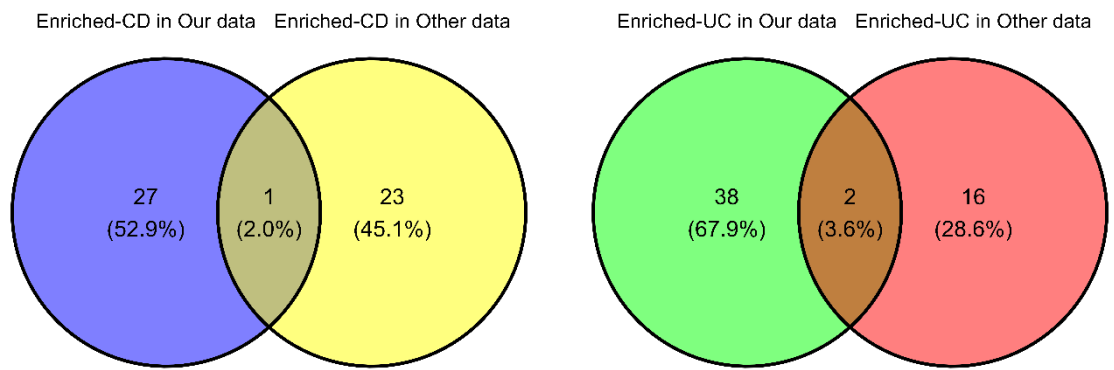

Fig. S7

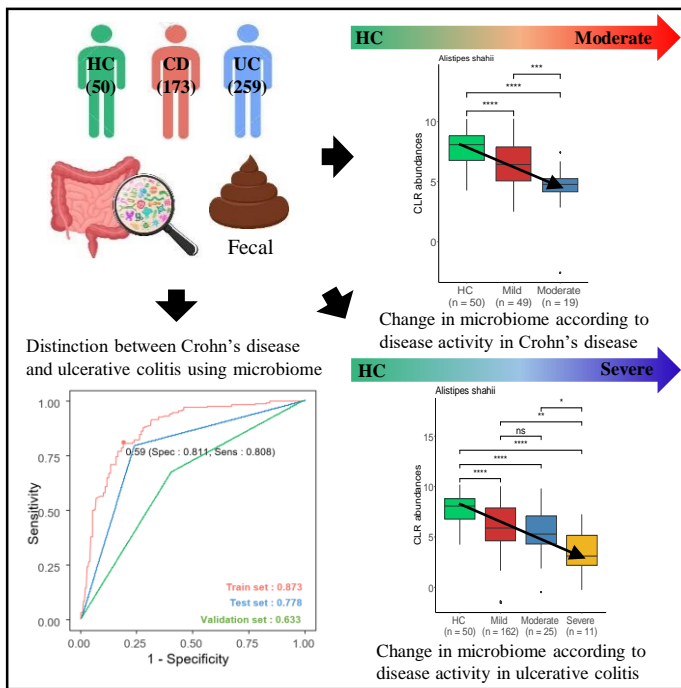

Supplement: 12866_2023_3084_MOESM1_ESM.pdf [file 12866_2023_3084_MOESM1_ESM.pdf]
